# Supplementary material
Source: publisher site journal article supplement (https://www.dovepress.com/article/598143)
Supplement: Supplementary file 1 [file 598143%20Supplementary%20Table%201.docx]

**Supplement table 1. Multivariable regression analysis of potential predictors of diminished response to FF/VI in small airway parameters**

|  | OR | 95% CI | *p*-value |
| --- | --- | --- | --- |
| Age, years old | 0.972 | 0.94-1.01 | 0.154 |
| Sex, male | 4.713 | 0.76-29.2 | 0.095 |
| BMI | 0.932 | 0.77-1.13 | 0.475 |
| Smoking | 1.011 | 0.15-6.58 | 0.991 |
| IgE | 0.999 | 0.99-1.01 | 0.096 |
| Eosinophils | 1.001 | 0.99-1.01 | 0.564 |
| AE last year | 0.952 | 0.17-5.38 | 0.956 |
| ACT | 0.874 | 0.64-1.19 | 0.401 |

ACT, Asthma Control Test; AE, annual exacerbation; BMI,body mass index
